# Supplementary material for: Metabolomic Profiling of 13 Diatom Cultures and Their Adaptation to Nitrate-Limited Growth Conditions
Source: PLoS One. 2015 Oct 6;10(10):e0138965. doi: 10.1371/journal.pone.0138965 (PMC4595471; doi:10.1371/journal.pone.0138965)
Supplement: S1 Table — Following culture abbreviations were used: Ampant, Amphitetras antediluviana; Bidbid, Biddulphia biddulphiana; Cerdea, Cerataulina daemon; Chasim, Chaetoceros simplex; Eunlae, Eunotogramma sp.; Hemsin, Hemiaulus sinensis; Lepdan, Leptocylindrus danicus; Rhiset, Rhizosolenia setigera; Thafra, Thalassionema frauenfeldii; Tp1007, Thalassiosira pseudonana CCMP1007; Tp1335, Thalassiosira pseudonana CCMP 1335; Tw1587, Thalassiosira weissflogii CCMP 1587; Tweiss1336, Thalassiosira weissflogii. The “N” suffix marks samples from low nitrogen growth conditions. (XLS) [file pone.0138965.s001.xls]

## Sheet: Lipid_Normalized_Data
	Ampant_1	Ampant_3	Ampant_4	Ampant_5	Ampant_6N	Ampant_7N	Ampant_8N	Ampant_9N	Ampant_10N	Bidbid_1	Bidbid_2	Bidbid_3	Bidbid_4	Bidbid_5	Bidbid_6N	Bidbid_7N	Bidbid_8N	Bidbid_9N	Bidbid_10N	Cerdea_1	Cerdea_2	Cerdea_3	Cerdea_4	Cerdea_5	Cerdea_6N	Cerdea_7N	Cerdea_8N	Cerdea_9N	Cerdea_10N	Tp1007_1	Tp1007_2	Tp1007_3	Tp1007_4	Tp1007_5	Tp1007_10N	Tp1007_6N	Tp1007_7N	Tp1007_8N	Tp1007_9N	Tp1335_1	Tp1335_2	Tp1335_3	Tp1335_4	Tp1335_5	Tp1335_6N	Tp1335_7N	Tp1335_8N	Tp1335_9N	Tp1335_10N
DAG 34:2	20.4298	20.3275	20.2481	19.6188	19.9507	19.2633	19.9883	19.9555	19.5745	NA	NA	NA	NA	NA	NA	NA	21.7064	NA	NA	13.8255	14.8152	14.0963	13.338	12.6712	12.2127	13.1957	12.7174	13.7232	14.0953	NA	NA	NA	NA	NA	NA	NA	NA	NA	NA	NA	NA	NA	NA	NA	NA	NA	NA	NA	NA
DAG 34:3	21.3368	21.0064	21.3621	20.0451	21.2428	20.3033	20.5455	21.0328	20.4373	NA	NA	NA	NA	NA	NA	NA	NA	NA	NA	14.3885	14.6097	16.1266	14.593	13.95	13.5038	13.7226	14.2449	14.8787	15.3071	NA	NA	NA	NA	NA	NA	NA	NA	NA	NA	NA	NA	NA	NA	NA	NA	NA	NA	NA	NA
DAG 34:4	22.4653	21.8172	22.5114	21.7619	22.5785	21.7006	22.3643	21.5506	21.6892	NA	NA	20.1404	NA	19.8263	21.2706	21.5632	22.0976	20.2816	20.4571	15.1647	15.5292	16.0396	15.4656	15.1891	16.0832	16.0527	16.6005	16.4663	17.2535	13.4033	12.9561	13.0357	13.6207	12.9502	14.1496	13.789	14.0057	14.1577	13.8729	14.7768	13.6707	12.9641	14.3205	13.9111	14.5392	14.841	14.9083	15.0228	14.4175
DAG 34:5	NA	NA	NA	NA	NA	NA	NA	NA	NA	NA	NA	NA	NA	NA	NA	NA	NA	NA	NA	17.9314	18.3187	19.4384	18.3458	18.0299	18.0397	17.8507	18.4471	18.4935	18.7457	12.2373	12.1312	12.2334	12.6625	12.2334	12.8591	12.5119	12.7262	12.4693	12.3571	12.7873	12.523	12.0023	12.8961	12.9223	12.867	13.0493	12.9456	13.6788	12.9507
DAG 34:6	NA	NA	NA	NA	17.2209	17.0407	17.26	16.4561	16.5003	NA	NA	NA	NA	NA	20.1261	19.9248	20.0058	21.6099	21.5345	15.7821	16.5576	17.0256	16.0584	15.5415	15.9501	15.8271	16.0577	16.1806	16.846	9.21428	8.30742	9.12255	7.69706	9.15917	9.40851	9.56559	9.23776	9.6667	8.01595	10.3632	10.2615	9.52339	10.464	10.4075	9.60745	9.67363	10.1364	10.2068	9.71016
DAG 36:2	NA	NA	NA	NA	NA	NA	NA	NA	NA	NA	NA	NA	NA	NA	NA	NA	NA	NA	NA	13.0979	13.7003	13.9927	13.0615	14.5609	NA	NA	NA	NA	NA	NA	NA	NA	NA	NA	NA	NA	NA	NA	NA	NA	NA	NA	NA	NA	NA	NA	NA	NA	NA
DAG 36:3	NA	NA	NA	NA	NA	NA	NA	17.1245	NA	NA	NA	NA	NA	NA	NA	NA	NA	NA	NA	NA	NA	NA	NA	NA	NA	NA	NA	NA	NA	NA	NA	NA	NA	NA	NA	NA	NA	NA	NA	NA	NA	NA	NA	NA	NA	NA	NA	NA	NA
DAG 36:4	NA	NA	NA	NA	NA	NA	NA	NA	NA	NA	NA	NA	NA	NA	NA	NA	NA	NA	NA	NA	NA	NA	NA	NA	NA	NA	NA	NA	NA	NA	NA	NA	NA	NA	NA	NA	NA	NA	NA	NA	NA	NA	NA	NA	NA	NA	NA	NA	NA
DAG 36:5	NA	NA	NA	NA	NA	NA	NA	NA	NA	NA	NA	NA	NA	NA	NA	NA	NA	NA	NA	NA	NA	NA	NA	NA	NA	NA	NA	NA	NA	NA	NA	NA	NA	NA	NA	NA	NA	NA	NA	NA	NA	NA	NA	NA	NA	NA	NA	NA	NA
DAG 36:6	24.3933	24.3364	24.6265	23.9748	24.3755	23.8113	24.462	23.779	24.0075	24.3939	24.6196	24.842	25.0391	24.4039	25.3177	25.2222	25.8174	24.9389	24.7172	20.309	20.6808	21.4171	20.284	20.0623	20.3929	20.1635	20.4475	20.4786	21.127	15.716	15.2224	15.6828	15.6132	15.5007	15.5464	15.1408	15.2813	15.114	15.2755	15.0402	14.15	14.0926	14.8308	14.4096	14.3933	14.8672	14.8938	15.0322	14.8979
DGDG 32:0	NA	NA	NA	NA	NA	NA	NA	NA	NA	NA	NA	NA	NA	NA	NA	NA	NA	NA	NA	14.6802	15.2217	15.8582	14.4691	15.5576	12.6558	15.4687	14.8325	15.6447	15.1731	10.2926	10.3375	10.3248	10.4976	9.98175	11.2288	10.9127	12.0578	11.0599	11.5616	9.97891	9.95233	9.45997	10.2487	10.1068	10.3921	11.1009	10.1601	11.0953	10.5433
DGDG 32:1	25.0253	24.7144	24.7673	24.6249	24.9508	24.0727	25.0502	24.0811	24.1818	25.3712	25.572	25.5241	25.4295	25.1037	25.5288	25.5633	26.1142	25.1362	25.3143	17.9101	17.8061	18.2529	17.593	18.1326	17.6042	18.4694	17.7153	18.4753	17.7183	16.0362	16.1553	16.3345	16.628	16.0991	16.8199	16.0456	16.8306	16.0536	16.3736	16.5836	16.3695	16.2307	16.978	17.1536	17.1422	17.1555	16.6379	16.8973	17.0408
DGDG 32:2	23.0632	23.0448	22.8599	22.7087	23.1451	22.2197	23.1986	22.0404	22.4988	22.7633	22.8084	22.8661	22.9623	22.5875	22.7647	23.04	23.3538	22.4821	22.721	17.0552	16.6575	17.1153	16.6043	17.0297	16.4656	16.9885	16.1074	16.8904	15.9816	15.5639	16.2152	16.1193	16.2076	16.0895	15.8261	14.9199	15.6078	14.8682	15.4046	15.8711	15.5201	15.5826	16.4007	16.5561	15.7792	15.6934	15.2488	15.6001	15.8023
DGDG 32:3	19.4015	18.9499	19.5134	18.955	18.8903	18.0548	18.5686	18.2495	18.2741	NA	NA	17.8407	18.0951	18.1942	19.7724	19.0924	19.2307	18.0913	17.5219	14.5442	14.1382	14.4979	13.9075	14.2231	13.7224	14.1367	13.2168	13.9484	12.8941	12.3985	12.8445	12.7261	12.8027	12.7823	12.9274	11.8159	12.7244	11.7925	12.5025	12.9635	12.6733	12.6071	13.2108	13.4765	12.665	12.4065	12.0747	12.3657	12.6448
DGDG 32:4	NA	NA	NA	NA	NA	NA	NA	NA	NA	NA	NA	NA	NA	NA	NA	NA	NA	NA	NA	13.2714	13.3227	13.7232	12.9876	13.8909	11.7485	13.9651	13.3954	14.0501	13.2697	12.4382	13.2202	13.0205	12.9863	13.1716	13.1794	12.2181	13.125	12.1042	12.8987	13.7673	13.3396	13.3284	13.9261	14.0557	12.7914	13.1701	12.4883	12.9163	12.897
DGDG 34:1	18.1101	16.928	NA	NA	18.5462	18.3369	19.0742	17.2849	17.4706	NA	NA	NA	NA	NA	NA	NA	NA	NA	NA	15.5539	15.7551	16.3391	15.5626	16.3876	14.0705	16.7327	16.2106	16.9278	16.0808	NA	NA	NA	NA	NA	NA	NA	NA	NA	NA	7.64924	6.30015	NA	NA	NA	NA	NA	NA	6.91004	NA
DGDG 34:4	20.5358	20.7151	20.5124	20.7005	20.6405	19.8386	20.8409	19.6103	19.7773	NA	NA	NA	NA	NA	NA	NA	NA	NA	NA	11.3039	11.0536	11.448	11.3258	12.5145	NA	12.3671	11.4252	12.0175	10.0644	11.5715	11.5732	11.8148	12.0355	11.6614	12.775	12.3678	13.1573	12.2245	12.8933	12.7424	12.3305	12.098	12.8296	12.9121	13.4869	13.8782	13.3137	13.7262	13.655
DGDG 34:5	22.5407	23.0118	22.7772	22.9387	22.8726	21.8534	22.8838	21.6797	22.1408	24.0568	24.3952	24.1881	24.2759	23.9549	24.3973	24.3699	24.7714	23.8596	23.9457	15.861	15.5132	16.0027	15.4385	15.8753	14.5722	15.1966	14.7082	15.1784	14.9593	12.903	13.4461	13.4486	13.2418	13.3924	13.1441	12.2423	13.0625	12.3754	12.8872	14.0407	13.7098	13.621	14.0873	14.1424	13.5039	13.4739	13.2805	13.55	13.5622
DGDG 34:6	18.7086	19.4523	18.837	19.0338	19.2183	18.3217	19.0214	18.1484	18.5279	NA	NA	19.7501	NA	19.7262	18.9836	20.4183	20.4617	NA	18.8647	12.6698	12.7143	13.4905	12.3056	13.2252	NA	12.2108	NA	12.8885	NA	12.4562	13.1209	12.9943	12.8631	13.0983	12.5857	11.391	12.2668	11.661	12.1555	12.6919	12.0553	12.037	12.3543	12.6812	11.6485	11.8541	11.4823	11.8359	12.1274
DGDG 36:5	22.2181	22.046	21.9586	21.748	22.0972	21.5068	22.3379	21.2202	21.4089	22.6872	23.2017	23.1466	22.9712	22.8266	23.0295	23.2183	23.5029	22.5938	22.9581	15.5302	15.1046	15.6786	14.763	15.4908	14.7023	15.5179	14.7916	15.3827	14.7004	12.2907	12.4798	12.7325	12.5823	12.4245	12.766	12.007	12.964	12.0649	12.6962	13.1942	12.9658	12.9165	13.5951	13.5206	11.9669	12.2285	11.785	12.3315	12.2691
DGDG 36:6	27.1791	27.1283	27.0626	26.9961	27.2024	26.2204	27.0709	26.1356	26.5133	25.6009	25.7066	25.3773	25.5416	25.4106	25.4029	25.6817	25.8433	24.5972	25.0346	18.3287	17.961	18.4655	17.5431	18.1402	17.7619	18.3569	17.3939	17.9784	17.3603	15.5242	16.007	15.8249	15.8041	15.7406	15.0746	14.1716	15.0687	14.3864	14.705	16.3703	15.748	15.7133	16.3076	16.4351	16.0826	16.2177	15.7903	16.1065	16.1902
MGDG 32:1	28.4641	28.6458	28.6071	28.4821	28.6969	27.5972	28.4871	27.6022	28.3261	31.6694	31.7787	31.5738	31.6379	31.1861	31.2897	31.537	32.0325	31.1769	31.3428	21.4187	21.2137	21.4681	21.1203	21.5684	21.2605	22.2303	21.2697	21.8063	21.1007	20.029	20.1582	20.4203	20.6077	20.2221	20.5157	19.9745	20.4459	19.9427	20.1764	19.9634	19.383	19.5399	20.2023	20.2568	20.1671	20.0938	19.8092	20.0167	20.0915
MGDG 32:2	26.3056	26.6226	26.4959	26.3246	26.5244	25.4371	26.33	25.4698	26.2283	28.405	28.4701	28.2667	28.2941	27.9387	27.9808	28.1895	28.6989	27.6437	27.9573	19.1632	18.8774	19.219	18.7974	19.0849	18.5252	19.617	18.5695	19.2098	18.3864	18.0474	18.2346	18.4981	18.5089	18.3284	18.0725	17.3379	17.8611	17.341	17.5508	17.5936	17.0318	17.2629	17.8742	17.9822	17.3688	17.2768	17.1243	17.3343	17.2954
MGDG 32:3	25.9593	26.462	26.1565	26.1838	26.3941	25.1724	25.9752	25.2769	26.1088	29.4872	29.6366	29.4922	29.4731	28.9344	29.2152	29.4102	29.8941	29.2456	29.3599	19.545	18.9125	19.3571	18.8334	19.1991	19.1724	19.7648	18.5584	19.1152	18.2385	18.5142	18.4773	18.8713	18.8348	18.5929	18.6435	17.9471	18.461	18.0172	18.371	18.6697	18.1127	18.1176	18.8977	18.9295	18.0212	17.9126	17.891	18.0078	18.0184
MGDG 32:4	26.1564	26.3017	26.7192	26.4291	26.2131	25.1986	22.9956	25.6341	25.7481	30.302	30.4812	30.2996	30.3392	30.005	30.2713	30.4392	30.8155	29.6416	30.0866	17.0943	16.6122	17.1192	16.6876	16.9065	16.8756	17.532	16.0997	16.8097	15.6161	18.2202	18.0295	18.6521	18.6469	18.1876	17.992	17.7327	18.3905	17.7268	17.8052	18.3103	17.956	17.7329	18.7744	18.8045	18.21	17.4021	17.613	18.0104	17.9991
MGDG 32:5	22.8865	24.007	23.3025	23.4933	23.7653	22.4395	23.3576	22.4929	23.2318	27.6002	27.7992	27.6395	27.6543	27.3419	27.4709	27.738	28.0517	26.8693	27.4064	18.9427	14.8084	15.3555	14.6069	14.9595	13.969	14.0567	13.0102	13.563	13.1942	17.9853	17.9861	18.4322	18.4554	18.1714	18.0319	17.4706	17.871	17.29	17.607	18.5807	18.1618	18.135	18.8765	18.9429	18.4165	18.1588	18.0559	18.1449	18.1457
MGDG 32:6	19.8001	20.2096	20.5062	20.6584	19.9148	18.9642	19.5702	19.3786	19.3748	24.599	24.619	24.4589	24.7202	24.1558	24.6077	24.6958	25.1866	23.9716	24.2441	18.0082	17.6952	18.3033	17.4955	17.7145	17.1085	17.3626	16.3276	16.905	16.5025	17.7436	18.125	18.1449	18.3459	18.1161	18.0707	17.2218	17.8437	17.1765	17.6104	18.3013	17.6441	17.7711	18.3165	18.4246	18.1947	18.0671	17.8148	18.0089	18.0556
MGDG 34:1	20.9767	21.0005	20.7675	20.6423	21.4274	20.4155	21.3051	20.3481	20.9831	24.3834	24.6245	24.7859	24.6532	24.2858	24.7362	24.9024	25.3181	24.1018	24.276	17.3148	17.7555	18.1308	17.5669	18.3012	16.724	19.1573	18.1343	19.1088	17.9508	10.7012	10.6319	11.1437	10.7029	10.5316	12.2418	10.787	11.3246	11.0097	10.8927	10.5485	9.42458	9.6213	10.3805	9.8557	9.69117	10.4143	10.4221	10.7874	10.2024
MGDG 34:2	21.6808	21.8705	21.6113	21.4507	22.0986	20.9104	21.8955	20.8859	21.7178	24.557	24.7051	24.8877	24.8284	24.4554	24.5879	24.8487	25.3222	24.2063	24.4382	16.6743	16.7345	17.1844	16.6719	17.2636	15.3851	17.6476	16.8811	17.527	16.7978	10.5918	10.5314	10.8089	10.9849	10.4876	10.2788	10.1269	11.1423	10.4171	10.5354	9.58209	8.24284	9.26607	8.98765	8.17847	NA	9.56395	9.06683	9.89384	8.44764
MGDG 34:3	22.8583	23.1815	22.7509	22.6567	23.3822	22.0923	23.0504	22.106	23.0206	25.477	25.6572	25.7988	25.801	25.3521	25.8323	25.9661	26.3211	25.291	25.5276	15.9026	15.7224	16.1865	15.7492	16.3152	15.9548	16.238	15.5646	16.1627	15.2937	10.4738	10.599	10.4897	9.76849	10.6023	11.4268	9.03479	9.9453	8.78427	9.73996	12.6711	11.8925	11.5404	12.147	12.2006	11.2078	11.76	11.7927	12.0002	12.0335
MGDG 34:4	21.219	21.6009	21.3674	21.2617	21.8066	20.8328	21.5123	20.3126	21.2263	24.1171	24.2518	24.3383	24.3054	23.8067	24.1896	24.4961	24.7175	23.4958	23.9813	12.8886	13.1104	13.6241	NA	13.6822	NA	11.9759	11.638	NA	11.4292	13.7826	13.8745	14.0531	14.1593	13.844	14.016	13.4723	14.1652	13.4665	13.7872	14.6589	13.9221	13.8721	14.5265	14.5996	13.9907	14.1284	14.1791	14.3873	14.1756
MGDG 34:5	22.4544	23.1717	22.6327	22.7547	23.252	21.9724	22.8221	21.7405	22.7516	23.8423	24.0178	24.0923	24.0371	23.6358	23.7594	23.883	24.3003	23.205	23.6317	15.2477	15.0243	15.3201	15.0898	15.4364	13.7891	15.6521	14.4319	15.0016	14.3385	14.9609	15.0097	15.2088	15.3889	15.022	14.7779	14.3815	14.7804	14.2987	14.4874	14.9735	14.2827	14.4298	15.1236	15.0947	14.8878	15.1067	14.8724	15.0756	14.9645
MGDG 34:6	18.0601	18.456	18.3521	18.018	18.372	17.2785	18.1301	17.4919	18.3276	22.741	22.6191	22.6702	22.7763	22.3621	22.9173	22.9184	23.2336	22.0394	22.3393	14.5083	14.288	14.8846	14.2107	14.8273	10.2291	14.9128	13.6346	14.8976	13.2899	14.9098	15.0035	15.3173	15.392	14.9153	14.5742	14.4608	14.8279	14.263	14.4864	15.7298	15.2619	15.2109	15.9006	15.9497	15.2093	15.1691	15.0126	15.2116	15.1045
MGDG 36:2	21.8953	21.5272	22.1002	21.9143	21.1921	20.7006	21.213	20.9238	20.9684	23.5089	23.6398	23.4186	23.4509	22.8408	23.905	23.6879	25.0643	23.9682	24.0092	16.8213	16.7804	17.2362	16.5412	16.4587	17.0666	16.6026	16.6161	17.0397	17.0347	NA	NA	NA	NA	NA	NA	NA	NA	NA	NA	NA	NA	NA	NA	NA	NA	NA	NA	NA	NA
MGDG 36:4	NA	NA	18.3132	NA	18.5131	16.8484	NA	17.4818	17.4108	NA	NA	NA	NA	NA	NA	NA	NA	NA	NA	14.0487	12.6186	11.9073	13.5668	13.3855	NA	14.6422	14.0143	14.049	14.0076	8.95881	NA	9.76552	9.75806	NA	10.199	NA	NA	8.59832	NA	NA	NA	NA	NA	NA	NA	NA	NA	NA	NA
MGDG 36:6	27.1142	27.3532	27.0799	27.1052	27.3706	26.124	26.9267	26.0502	27.1309	27.5652	27.8591	27.8766	27.8273	27.3959	27.7331	27.8547	28.207	27.026	27.4361	18.4121	18.2637	18.711	18.0869	18.6215	17.4024	18.4357	17.5602	18.1639	17.47	17.0595	17.2127	17.4143	17.3794	17.2458	16.141	15.5434	15.9121	15.6365	15.7712	16.4228	15.6806	15.8121	16.5036	16.3071	15.0016	15.2043	15.3193	15.4152	15.3602
PC 32:0	NA	NA	NA	NA	NA	NA	NA	NA	NA	NA	NA	NA	NA	NA	NA	NA	NA	NA	NA	NA	NA	NA	NA	NA	NA	NA	NA	NA	NA	NA	NA	NA	NA	NA	NA	NA	NA	NA	NA	NA	NA	NA	NA	NA	NA	NA	NA	NA	NA
PC 32:1	23.2964	24.3601	23.2031	23.7101	24.3093	23.4429	24.4625	23.1167	23.7964	23.3642	24.6388	24.1544	23.8204	23.5682	22.8049	23.1448	24.5325	23.2547	24.243	19.0614	18.4476	18.9927	18.4099	18.3938	19.1236	19.4411	18.6067	18.967	18.6639	17.5134	17.8512	17.8302	17.969	17.7352	17.2008	15.9999	16.6422	15.8409	16.6379	18.8779	18.4826	18.185	19.0241	19.0552	18.0762	18.3692	18.1316	18.1829	18.431
PC 32:2	23.3809	24.2227	23.2465	23.5106	24.3691	23.3459	24.422	23.0521	23.8754	23.0977	24.6359	24.1311	23.4385	23.2734	22.3397	22.917	24.4244	23.0052	24.1593	17.6515	16.953	17.1941	16.7542	17.0034	17.2417	17.524	16.5477	17.141	16.2806	15.7954	16.2344	16.2919	16.3422	16.2849	15.7401	14.7448	15.176	14.5303	15.0488	17.4033	16.8555	16.5588	17.5557	17.5248	16.2332	16.4519	16.4446	16.4654	16.6771
PC 32:3	23.0936	23.4271	22.888	23.2112	23.7283	22.7702	23.6476	22.6846	23.2823	26.175	27.3225	26.9687	26.342	26.1967	25.5252	26.0608	26.9683	25.7638	26.8473	15.7859	15.7817	15.9541	15.8604	16.1305	13.64	15.673	14.5885	15.5379	14.107	17.0203	16.993	17.2117	17.4122	17.0948	17.0746	16.0526	16.5213	16.0036	16.5011	17.1526	16.7302	16.4386	17.3955	17.2488	16.8189	16.91	16.8502	16.8647	17.0165
PC 32:4	15.3216	16.8855	16.0044	15.8113	16.4722	15.5449	16.6148	15.5655	16.0107	19.6396	20.5536	20.37	19.9935	19.6479	20.0995	20.2384	20.7436	19.2249	20.0187	13.2843	12.9539	13.1853	12.9525	13.1709	12.0379	13.9156	12.8264	13.8667	12.5418	13.9618	14.3566	14.3796	14.3019	14.0749	14.0512	13.4313	13.9686	13.1058	13.7017	15.3394	14.8393	15.011	15.411	15.4959	14.6331	14.5842	14.3447	14.5241	14.5719
PC 32:5	21.7413	22.349	21.209	21.2097	22.5116	21.6136	22.493	21.72	21.7956	23.7789	23.886	22.8741	23.3799	23.6888	23.5158	22.9782	23.6493	22.6454	23.6798	13.0122	NA	13.1145	NA	14.2443	NA	NA	NA	NA	NA	13.6397	13.977	14.2573	14.0634	14.1589	13.1188	12.2482	12.5611	11.9293	12.282	15.405	15.0542	13.9481	15.4008	15.3975	13.6385	13.1394	13.2176	12.7964	13.4304
PC 32:6	NA	NA	NA	NA	NA	NA	NA	NA	NA	23.512	24.6463	25.1642	23.0367	24.1546	22.8597	24.1162	24.6053	22.5835	25.1121	NA	NA	NA	NA	NA	NA	NA	NA	NA	NA	13.4269	14.132	13.978	13.7534	14.0957	13.6517	12.3827	13.3013	12.5893	13.1736	14.7901	13.9774	14.0475	14.317	14.4252	13.5479	13.6261	13.471	13.8113	13.9322
PC 34:1	19.588	20.4575	19.44	20.054	21.008	20.006	20.9998	19.6701	20.0695	NA	NA	NA	NA	NA	18.1813	17.6357	19.2212	18.2565	18.5897	13.2244	12.4309	12.5932	12.9779	13.3654	14.7047	16.191	15.0245	15.4038	14.6029	12.831	12.4635	12.5915	13.4076	12.3795	12.4332	11.845	12.3155	11.8734	12.1823	12.7195	11.7967	11.6356	12.3654	12.1355	12.3806	13.4382	12.6982	13.1911	13.2381
PC 34:2	23.0678	23.9995	22.9061	23.3858	24.2704	23.2875	24.3885	22.8846	23.6727	NA	NA	NA	NA	NA	NA	NA	NA	NA	NA	17.5214	16.9251	17.3741	17.0719	17.0487	17.9344	18.7855	17.579	18.1982	17.3746	15.8032	15.472	15.2865	16.1548	15.2741	15.4831	15.132	15.7586	14.9344	15.3887	16.2711	15.6503	15.7782	16.2943	16.2733	15.7086	16.5658	15.9756	16.4684	16.4232
PC 34:3	23.6511	24.3875	23.4181	23.5562	24.2733	23.3497	24.4319	23.0291	23.9789	23.7568	25.7218	25.4902	24.4519	24.3831	23.8672	24.2565	25.6968	24.3984	25.4327	18.9857	18.1401	18.437	18.1783	18.304	18.8893	19.2217	18.2045	18.7371	17.7865	16.6449	15.7669	15.8694	17.1544	15.6935	14.8563	14.8565	15.7496	14.8291	15.0569	15.8762	15.4803	14.7476	15.8487	15.865	14.9344	15.7443	14.8262	15.4429	15.1139
PC 34:4	23.3461	23.9697	23.1838	23.4294	23.9787	23.0989	24.0958	22.7459	23.6015	24.6756	25.7659	25.3136	24.9129	24.5469	23.8653	24.3487	25.4088	24.4296	25.1643	15.195	14.7279	15.0333	14.59	14.7699	14.2115	15.5185	14.4242	15.1602	13.8522	17.689	18.112	18.0874	18.099	17.9852	18.1445	17.1141	17.8786	17.0521	17.6382	19.1455	18.6029	18.5135	19.207	19.3103	18.8413	18.9581	18.6433	18.8606	18.8953
PC 34:5	23.1897	23.7831	23.2964	23.3411	23.9116	22.9705	23.9043	22.6412	23.4646	21.1196	22.701	22.5679	21.6348	21.21	21.6441	21.7875	22.8533	20.758	22.4972	17.5415	17.4605	17.5943	17.737	17.9077	16.8125	18.9762	18.1324	18.8843	17.9073	15.1591	15.7607	15.9487	15.6333	15.771	16.2778	16.0302	16.4326	15.9107	16.072	17.6083	17.0111	16.7162	17.3401	17.3311	15.8476	15.5734	15.6059	15.4504	15.9627
PC 34:6	21.9333	22.8693	21.2951	21.4441	22.7088	22.0023	23.048	21.8799	22.4667	26.3732	26.7094	26.033	26.3794	26.0899	26.3543	25.9022	26.7528	25.9988	26.4948	14.8966	14.3601	14.5178	14.3304	14.8749	NA	13.7974	11.4912	12.7531	NA	15.6612	16.2899	16.4027	16.1516	16.3995	15.0732	13.7109	14.1963	13.7904	14.4181	17.0321	16.5789	15.6858	16.8521	17.1087	15.9305	14.8305	15.1953	14.6866	15.2748
PC 36:2	24.4112	24.3097	24.2109	24.0647	24.2414	23.4999	24.4706	23.5969	23.9248	25.3342	25.1994	24.8004	25.0659	24.844	NA	NA	25.766	25.7743	25.3497	18.7499	18.1694	18.9821	18.5886	18.9208	19.2404	18.7191	18.6065	18.9243	19.428	13.3205	12.9547	12.5128	13.6619	12.6764	12.9032	11.9803	12.7357	12.2307	12.8832	11.5783	10.5902	10.5346	11.496	11.5355	11.085	12.2032	11.7748	12.0688	12.4585
PC 36:3	17.2294	17.1369	16.9069	16.4546	17.2223	16.9873	17.6483	17.4709	16.9205	NA	NA	NA	NA	NA	NA	NA	NA	NA	NA	13.1056	12.5784	13.0104	13.4704	14.2681	12.2736	14.5733	13.2219	14.4142	13.7425	12.4063	12.4004	12.2048	12.7191	12.1711	12.458	11.8924	12.9649	11.905	12.5941	12.3938	11.6817	12.4109	12.6557	12.4246	11.6541	12.3181	12.1331	12.3089	12.372
PC 36:4	24.2193	24.9116	24.1303	24.4691	25.1582	24.2497	25.1718	23.8861	24.59	31.3725	32.1132	31.7042	31.5234	31.2524	31.0602	31.3674	31.9128	30.6674	31.5359	16.618	16.2546	16.5703	16.6376	16.9438	12.5591	15.7784	14.1238	15.5018	12.7579	13.3076	13.295	13.3296	13.9594	13.4947	14.7551	14.7591	15.3039	14.5996	14.7184	15.1763	14.5192	14.4153	14.9436	14.8552	14.2027	14.3071	14.4426	14.2485	14.5579
PC 36:5	23.4097	23.9446	23.2712	23.4016	23.8558	22.8873	23.9718	22.7916	23.4499	27.4262	27.9259	27.6044	27.6191	27.252	27.6631	27.6824	28.0694	26.8953	27.627	18.9219	18.9994	19.1835	19.0966	19.3411	18.3554	20.2173	19.4177	20.0874	19.2431	18.553	18.741	18.8886	18.911	18.7603	18.814	18.412	18.9468	18.2458	18.5018	17.8395	17.3236	17.3183	17.8507	17.8113	18.3487	19.1709	18.3977	18.8637	18.7111
PC 36:6	23.1636	24.1563	23.1528	23.4057	24.3663	23.3837	24.2981	22.9457	23.8754	24.7293	26.089	25.2357	24.6611	24.6968	23.746	24.243	25.1559	23.4969	24.9426	19.4799	18.9532	19.3523	18.904	19.1575	18.8772	19.6938	18.6312	19.3776	18.2652	18.0816	18.3092	18.584	18.4671	18.4891	17.6099	16.3114	16.7406	16.2696	16.8146	19.6263	19.2544	19.0449	19.9404	20.0013	19.3083	19.0485	19.0205	18.9391	19.3478
PC 36:7	22.305	23.2535	22.9233	22.5728	22.9932	22.4581	22.6338	21.8223	22.5742	25.2899	26.447	25.5742	25.3342	25.1015	25.3632	25.2166	25.9436	24.5915	25.4891	17.0608	16.6267	16.7241	16.4983	17.0722	15.9981	16.9568	16.0387	16.7323	15.7623	17.8309	18.1911	18.2953	18.2524	18.3337	17.4641	16.116	16.4372	16.0258	16.411	19.2488	18.71	18.4638	19.2297	19.3257	18.4509	17.9682	18.0264	17.8267	18.3667
PC 38:1	NA	NA	NA	NA	NA	NA	NA	NA	NA	NA	NA	NA	NA	NA	NA	NA	NA	NA	NA	15.9875	16.0601	16.4466	16.1986	16.2728	14.2285	15.7393	16.7458	16.2857	16.8744	NA	NA	NA	NA	NA	NA	NA	NA	NA	NA	NA	NA	NA	NA	NA	NA	NA	NA	NA	NA
PC 38:2	19.0795	18.2381	19.6918	18.4265	18.4019	17.703	18.495	18.5844	18.5325	22.7001	23.3955	22.9945	23.0568	22.6862	22.3456	22.5456	23.6806	24.3501	23.3067	17.4679	17.7424	18.3797	17.1159	17.0647	17.5823	17.8359	17.9107	17.881	18.4934	NA	NA	NA	NA	NA	NA	NA	NA	NA	NA	NA	NA	NA	NA	NA	NA	NA	NA	NA	NA
PC 38:4	NA	NA	NA	NA	NA	NA	NA	NA	NA	NA	NA	NA	NA	NA	NA	NA	NA	NA	NA	NA	NA	NA	NA	NA	NA	NA	NA	NA	NA	NA	NA	NA	NA	NA	NA	NA	NA	NA	NA	NA	NA	NA	NA	NA	NA	NA	NA	NA	NA
PC 38:5	24.3874	25.1226	24.2349	24.2734	25.3642	24.1127	25.3526	23.6031	24.8398	23.9281	25.3723	25.159	24.6971	24.4477	24.2338	24.2987	25.452	23.9245	24.9749	16.0431	14.9532	15.121	15.3916	15.0739	15.612	16.4821	15.1453	15.6967	15.5599	21.0159	21.1488	21.2728	21.5158	21.1512	21.5057	20.8414	21.4597	20.7698	21.1052	12.154	11.4478	11.1959	11.9339	11.7899	11.9245	12.9025	12.3617	12.8117	12.6543
PC 38:6	25.5123	26.3447	25.1712	25.2922	26.4181	25.1746	26.3643	24.7672	26.029	25.0039	26.3715	26.1457	25.4465	25.0904	24.9033	25.1775	26.4051	25.108	26.069	18.509	18.3498	18.5721	18.4398	18.6707	18.9513	20.7089	19.7816	20.4193	19.4619	18.028	18.3035	18.5462	18.4746	18.3589	17.4494	16.7761	17.2039	16.6421	17.0157	16.4821	15.9877	16.1653	16.7922	16.6534	16.6244	17.3145	16.7337	17.1715	17.0378
PC 38:7	25.3883	26.241	25.0734	25.1619	26.2226	24.9818	26.3078	24.5659	25.9892	29.019	30.2457	29.9136	29.3559	29.009	28.6373	28.884	29.9673	28.7014	29.7116	21.027	20.2638	20.6599	20.3099	20.4026	20.6751	21.3776	20.3342	20.9637	19.9619	17.7077	17.5588	17.5644	18.1934	17.5251	17.5052	17.0615	17.4058	16.8145	17.0218	18.4993	17.8852	18.5843	18.8277	18.7364	18.8836	19.3118	18.6199	19.266	19.2422
PC 40:10	23.3939	24.0053	23.2692	23.1057	23.9801	22.7759	24.0926	22.5615	23.7223	NA	21.2145	19.7335	21.577	18.5208	NA	19.4553	19.4407	18.5967	20.2719	18.8729	18.379	18.6708	18.4718	18.5701	18.3757	19.5558	18.5554	19.2111	18.2371	17.7272	17.5651	17.9571	18.1816	17.7715	18.7312	17.9779	18.3618	17.9139	18.1261	16.8504	16.6048	16.8497	17.506	17.3523	18.3205	18.6778	18.0477	18.6224	18.4452
PC 40:5	NA	NA	NA	NA	NA	NA	NA	NA	NA	NA	NA	NA	NA	NA	NA	NA	NA	NA	NA	NA	NA	NA	NA	NA	NA	NA	NA	NA	NA	12.1543	12.3511	12.1541	12.5388	12.2759	12.8077	11.9938	12.9053	11.938	12.5536	NA	NA	NA	NA	NA	NA	NA	NA	NA	NA
PC 40:6	NA	18.9809	NA	NA	19.1124	18.0584	19.6576	16.5563	18.5224	NA	NA	NA	NA	NA	NA	NA	NA	NA	NA	NA	NA	NA	NA	NA	NA	NA	NA	NA	NA	19.1184	19.6989	19.6949	19.3947	19.6163	19.8106	19.0252	19.9006	19.0542	19.5511	NA	NA	NA	NA	NA	NA	NA	NA	NA	NA
PC 40:7	22.1572	22.8333	21.8349	21.6646	23.2132	21.7813	23.1386	21.3551	22.594	25.4782	26.8359	26.4877	25.9455	25.6101	25.2841	25.6181	26.6725	25.3171	26.279	16.1584	16.1685	16.4669	16.2296	16.651	15.5795	17.1709	16.4547	17.22	16.4539	13.7383	14.229	14.2419	14.1116	14.2838	13.4303	12.5038	13.2534	12.5279	12.965	14.712	14.0796	14.6294	15.0344	14.8052	13.9359	14.738	14.548	14.9122	14.7924
PC 40:8	28.4728	29.0433	28.0142	28.0024	29.045	27.8519	29.0958	27.5115	28.6484	28.9234	30.0355	29.5276	29.11	28.8115	28.4697	28.773	29.9878	28.7153	29.5563	15.3296	14.3177	14.7099	14.4837	15.0283	14.1597	15.9113	14.8896	15.9599	14.8024	15.1446	15.8164	15.8075	15.7293	15.8639	15.4772	14.3664	15.0046	14.4537	15.0729	11.947	11.0111	10.5557	11.8096	10.2292	NA	9.75957	9.64444	10.1003	9.5355
PC 40:9	27.4327	27.9721	27.0968	27.0931	27.9585	26.7123	27.9677	26.4597	27.6434	25.0496	26.4745	26.1497	25.4535	25.059	25.0018	25.3359	26.6039	25.1708	26.2266	18.1708	17.5938	17.9686	17.7516	17.9462	17.2629	18.5441	17.5382	18.256	17.181	16.7181	17.1733	17.2999	17.1975	17.1411	16.8485	16.519	17.0437	16.3299	16.6061	14.4317	14.216	14.9221	15.2815	15.0554	15.3057	15.8707	15.1368	15.8865	15.7851
PE 34:1	NA	NA	NA	NA	NA	15.9597	17.9671	NA	NA	NA	NA	NA	NA	NA	NA	NA	NA	NA	NA	17.1013	17.2256	17.7436	17.5555	17.6574	17.7852	18.5883	17.8638	18.3667	18.4209	NA	NA	NA	NA	NA	NA	NA	NA	NA	NA	NA	NA	NA	NA	NA	NA	NA	NA	NA	NA
PE 34:2	16.772	18.9795	17.6601	17.5399	18.7714	18.2403	19.9111	17.3395	18.8026	22.1766	22.7345	22.3872	22.4902	22.2543	22.2558	22.3303	23.5652	21.6469	22.5513	19.2084	19.581	20.3737	20.1276	20.0942	19.7468	21.0224	20.2131	20.75	20.6677	NA	NA	NA	NA	NA	NA	NA	NA	NA	NA	NA	NA	NA	NA	NA	NA	NA	NA	NA	NA
PE 34:3	NA	NA	NA	NA	NA	NA	NA	NA	NA	NA	NA	NA	NA	NA	NA	NA	NA	NA	NA	14.1161	13.9691	14.8213	14.7497	14.9997	13.0702	15.4844	14.4504	15.0393	14.9475	NA	NA	NA	NA	NA	NA	NA	NA	NA	NA	NA	NA	NA	NA	NA	NA	NA	NA	NA	NA
PE 34:4	NA	NA	NA	NA	NA	15.3454	17.2832	NA	NA	NA	NA	NA	NA	NA	NA	NA	NA	NA	NA	14.9211	15.6041	16.3758	16.1697	16.0758	15.0384	16.9671	16.3097	16.7622	16.6255	11.5355	12.0379	11.533	12.414	11.7235	12.0925	11.4064	12.202	10.7354	11.8288	11.2421	10.8076	9.45446	11.1588	11.4614	NA	10.5078	10.3807	10.0376	10.6205
PE 34:5	NA	NA	NA	NA	NA	NA	16.2777	NA	NA	NA	NA	NA	NA	NA	NA	NA	NA	NA	NA	15.0044	15.3848	15.9389	15.2275	15.6149	14.671	16.2551	15.651	16.0993	15.7869	8.74077	9.57888	9.28244	9.63846	9.13237	9.57838	8.74766	9.66538	8.10497	9.77118	9.49242	9.17862	8.29685	10.0724	10.8504	7.21384	8.74061	8.4969	7.75768	9.12159
PE 36:2	NA	NA	NA	NA	NA	NA	17.1034	NA	NA	NA	NA	NA	NA	NA	NA	NA	NA	NA	NA	15.2572	15.1639	15.8848	15.863	15.7385	15.7247	16.9135	16.0182	16.9301	16.5868	NA	NA	NA	NA	NA	NA	NA	NA	NA	NA	NA	NA	NA	NA	NA	NA	NA	NA	NA	NA
PE 36:3	NA	NA	NA	NA	NA	NA	NA	NA	NA	NA	NA	NA	NA	NA	NA	NA	NA	NA	NA	13.5529	13.9536	14.7267	14.596	14.5472	13.1292	15.3843	14.6419	15.1176	14.7197	NA	NA	NA	NA	NA	NA	NA	NA	NA	NA	NA	NA	NA	NA	NA	NA	NA	NA	NA	NA
TAG 48:4	31.1216	30.2774	31.05	30.5101	30.4756	29.2208	30.0944	29.7399	29.9747	33.5931	33.1085	33.0069	33.2217	32.6432	33.2507	33.222	33.6323	32.9318	32.8643	23.6443	23.9633	24.5242	23.5861	23.7153	24.5283	24.4173	24.2274	24.4595	24.9696	21.2807	20.9986	21.1439	21.8942	21.326	22.1451	22.0585	22.2693	21.9543	22.0227	21.1705	20.471	20.6104	21.6698	21.3365	21.8649	21.8384	21.7871	22.0607	21.5249
TAG 50:1	31.9284	31.2709	32.0756	31.3912	31.3722	30.2245	31.0215	30.7798	30.9871	30.8362	30.222	30.6119	30.7587	30.2831	31.158	31.0355	31.325	30.5761	30.1003	23.3506	23.4166	23.984	23.2402	23.4036	23.8106	23.6686	23.5142	23.6252	24.0665	20.489	20.386	20.4245	21.1539	20.7017	21.1523	21.0956	21.2163	21.1186	20.945	20.0129	19.2949	19.0743	20.3377	19.6978	20.2798	19.9735	20.4184	20.4063	19.9642
TAG 50:2	32.421	31.581	32.3878	31.9268	31.6078	30.5226	31.2858	31.0511	31.2423	32.7898	32.3517	32.3241	32.6605	32.1967	32.7911	32.7097	33.1595	32.3805	31.9429	24.5661	24.6487	25.3613	24.4828	24.6306	24.9579	24.9864	24.7918	24.9649	25.4034	20.0374	19.8871	20.0231	20.5348	20.2691	20.5327	20.3555	20.6076	20.2667	20.3867	19.6778	18.8341	18.8863	19.896	19.483	19.7292	19.5378	19.7983	19.8735	19.5483
TAG 50:3	30.9792	30.2566	30.9496	30.5318	30.3744	29.223	29.9499	29.7148	29.9114	30.9573	30.5736	30.5892	30.826	30.2678	30.9832	30.8479	31.1823	30.4887	30.2467	23.1258	23.2534	23.86	23.1676	23.1299	23.6911	23.4811	23.4857	23.6182	24.0413	16.2337	16.1742	16.066	16.7372	16.2449	16.6182	16.7472	17.0901	16.6954	16.6691	16.4521	15.732	15.7234	16.6514	16.5009	16.9209	16.6898	16.8561	17.0305	16.4688
TAG 50:4	31.6682	30.9222	31.8842	31.1666	30.7711	29.8405	30.6764	30.1105	30.3491	31.7579	31.3609	31.4844	31.7022	31.2474	31.8786	31.7969	32.2403	31.4385	31.0903	21.88	22.126	22.5755	21.8439	21.9371	22.6128	22.3695	22.3202	22.3387	22.8034	20.3033	19.8578	20.0558	20.7343	20.1565	21.1748	21.1704	21.3383	21.0125	21.0013	20.4445	19.7859	19.7774	20.8338	20.4285	21.3472	21.2787	21.2745	21.4282	20.9463
TAG 50:5	26.3397	25.6768	25.9976	25.9411	25.2349	23.1531	25.0863	24.4529	25.2058	29.3475	29.0699	28.7442	28.9029	28.157	26.8712	28.6313	28.7167	27.3575	27.804	20.8843	20.302	20.1158	NA	19.5956	20.6157	21.1506	21.0142	18.9402	21.8776	NA	15.8764	15.5544	17.3465	16.2358	17.0321	17.3387	17.6254	17.0072	17.2628	15.3124	15.7601	16.1616	16.9588	16.9192	15.3702	16.9335	16.8322	17.3273	15.4658
TAG 50:6	23.1706	22.6314	22.5274	22.001	22.7731	21.1132	22.4956	22.2273	22.3169	25.8229	25.3342	25.4902	25.5995	25.0368	24.0932	25.9913	26.2543	24.4742	24.9897	17.8229	17.5881	17.8658	NA	17.333	16.697	18.1521	17.99	NA	18.2496	NA	13.9078	13.8667	15.139	14.3458	15.1491	15.8771	15.8543	15.5774	15.7108	13.9229	14.3387	14.3316	15.3255	15.1364	13.616	15.1023	15.5971	16.098	13.6664
TAG 52:1	26.919	26.3215	26.9101	26.313	26.4941	25.3001	26.0575	25.9426	25.9806	27.5386	27.0992	27.2601	27.4605	27.1035	27.6812	27.4766	28.0487	27.1665	26.9894	21.5468	21.6002	22.1848	21.3061	21.2504	21.7219	21.2469	21.2308	21.2091	21.8404	16.5513	16.2624	16.4083	17.2419	16.6977	16.8009	16.9732	16.9487	16.8589	16.7685	16.315	15.3852	15.18	16.2993	15.9305	15.9056	15.7006	16.212	16.2026	15.7271
TAG 52:2	28.8651	28.3164	29.0195	28.2453	28.4178	27.2925	28.03	27.9639	28.0022	30.158	29.5943	29.8196	30.1938	29.7813	30.5072	30.4402	30.7153	29.7685	29.3044	22.3696	22.5388	23.1971	22.3448	22.4737	22.5247	22.3401	22.4466	22.5019	22.7341	17.6078	17.2391	17.5207	18.1101	17.6125	17.7217	17.6952	17.6719	17.5705	17.3695	16.7106	16.0462	15.5588	16.6915	16.3984	17.0381	16.0387	16.4045	16.944	16.5705
TAG 52:3	28.515	27.8391	28.7062	27.8733	28.139	26.9493	27.6082	27.4733	27.6362	28.0522	27.6737	27.9145	28.1832	27.7919	28.5873	28.2783	28.7012	27.8534	27.3553	21.0294	21.1587	21.877	21.0117	21.2235	21.1286	21.3925	21.323	21.4814	21.6374	15.131	14.8265	15.2525	15.4431	14.9871	15.3962	15.2453	15.2161	15.1435	14.8817	13.6904	13.475	12.7737	13.8292	14.0124	14.8327	13.5145	13.638	14.6459	14.4542
TAG 52:4	32.6327	31.9706	32.7214	32.1319	31.9279	30.9325	31.6736	31.3794	31.5109	30.2475	29.9347	29.8851	30.1581	29.716	30.3864	30.2168	30.7424	29.8555	29.6273	20.8795	21.0397	21.4162	20.7372	20.6345	21.4024	21.139	21.0564	21.0639	21.6805	17.3888	17.1884	17.0941	17.9032	17.4647	18.2724	18.5201	18.8285	18.4821	18.5559	17.0365	16.2376	15.8568	17.1624	16.7218	17.4171	17.5956	18.1132	18.0768	17.3617
TAG 54:2	26.0837	25.4743	26.1677	25.4128	25.5857	24.5285	25.2869	25.2064	24.9455	30.3723	29.9167	30.0609	30.3495	29.9626	30.7173	30.5767	30.8213	29.9735	29.6144	22.868	23.0248	23.4692	22.6576	22.6968	22.9641	22.5718	22.6693	22.6118	23.0865	16.7674	16.53	16.6278	17.2753	16.9249	16.7231	16.7926	16.6356	16.6077	16.4682	16.7207	16.1187	15.6998	16.8939	16.4668	16.4353	16.1734	16.6247	16.6802	16.2073
TAG 54:3	25.1623	25.0603	26.4923	25.4302	25.4251	24.6683	25.0854	25.4917	24.3935	28.53	28.0192	28.3074	28.8965	28.6024	29.0482	28.7304	29.3676	28.3373	27.6818	21.1885	21.5794	22.2444	21.4053	21.4353	21.5145	20.9177	21.2463	21.1948	21.5325	17.0485	16.4561	16.883	17.4162	16.6497	17.2456	17.0688	16.7071	16.8881	16.4604	15.7354	15.3273	14.039	15.1804	15.7564	16.7136	14.4207	14.9577	16.4437	15.9257
TAG 54:4	28.6309	28.1291	28.8702	28.0062	28.2001	27.3096	27.9173	27.5603	27.7172	27.7813	27.3034	27.6188	28.219	28.0066	28.4414	27.9433	28.6495	27.5552	26.6424	19.0701	19.4815	20.1109	18.9669	19.3856	19.2318	18.767	19.1575	18.9021	19.2848	15.9071	15.3277	15.964	16.5959	15.59	16.2358	16.2309	15.3851	16.0478	15.1355	14.0073	14.1169	12.6469	14.0353	14.0622	15.591	13.8482	14.6229	15.1928	14.7543
TAG 54:5	29.1567	28.4353	29.1546	28.482	28.3765	27.3329	28.1961	27.7192	27.9527	28.7994	28.3977	28.495	28.8049	28.2782	29.2365	29.0921	29.3283	28.4102	28.1037	19.9894	20.1727	20.6963	19.7964	19.8002	20.3557	19.9247	19.883	19.9577	20.4591	17.6902	17.2792	17.4225	18.2005	17.654	18.5789	18.9424	19.0377	18.8911	18.7939	12.9171	12.3953	12.5987	13.4708	13.3872	14.5014	14.2999	14.1631	14.0574	14.3463
TAG 54:6	28.8312	28.1153	29.1137	28.7037	27.472	26.4713	27.4208	26.7733	27.546	31.3666	30.9222	30.9687	31.1829	30.7824	31.5919	31.3325	31.7309	30.8594	30.5564	22.5418	22.7504	23.4403	22.3817	22.6879	22.7809	22.75	22.8038	22.8887	23.2449	18.5764	18.2715	18.4587	19.246	18.6655	19.5864	19.8887	19.828	19.7545	19.6643	16.621	15.8583	15.7647	16.9726	16.3907	16.8573	17.2075	17.2382	17.3833	16.7395
TAG 54:7	29.9201	29.4146	30.1152	29.4966	29.1986	28.1294	28.9204	28.7358	28.9144	31.1664	30.7389	30.7151	31.0441	30.6002	31.1575	31.2674	31.5062	30.7945	30.4418	22.488	22.9517	23.3063	22.6112	22.6786	23.0054	22.8804	22.7927	22.8801	23.3824	16.7409	16.3054	16.6215	17.4119	16.7276	17.5601	17.7497	17.7802	17.4381	17.5788	16.2463	15.5016	15.3808	16.5163	16.2605	16.5615	16.8625	16.8037	16.8588	16.4671
TAG 56:2	27.9444	27.4006	28.028	27.2681	27.4885	26.5085	27.1383	26.8195	26.8455	28.6898	28.2872	28.4166	28.6758	28.2291	28.9557	28.8593	29.1764	28.1659	27.8715	22.4881	22.5123	23.0992	22.3265	22.3725	22.5687	22.1509	22.1253	22.1582	22.7508	16.6457	16.4283	16.4005	17.1312	16.8742	16.5136	16.447	16.3138	16.4004	16.3633	16.5741	15.7638	15.4853	16.736	15.9698	15.8026	15.937	16.4579	16.4493	15.7934
TAG 56:3	24.9999	24.4879	25.1448	24.352	24.4716	23.6655	24.1445	24.0253	23.983	27.8066	27.3567	27.5358	27.8332	27.3693	28.1999	28.0114	28.4054	27.3418	27.0994	20.9395	21.1084	21.6089	20.7755	20.8807	20.9932	20.7958	20.842	20.7901	21.239	14.365	14.3891	14.2754	14.9023	14.9017	14.3079	14.2494	14.0356	14.1476	14.0532	14.9388	14.1984	13.9224	15.0855	14.5717	14.5042	14.2872	14.8837	14.872	14.2858
TAG 56:4	23.7117	23.1139	23.6797	23.0043	23.2409	22.1788	22.9635	22.5984	22.5959	24.0144	23.679	23.6384	23.9956	23.4273	24.1351	24.5136	24.6289	23.5947	23.4305	18.6788	18.6522	19.2464	18.3578	18.5016	18.6692	18.3298	18.2968	18.2735	18.7517	14.5614	14.2292	14.0906	14.9674	14.5714	14.6243	14.8599	14.8759	14.7885	14.6241	13.7564	12.8265	12.6139	13.8256	13.1552	13.5343	13.5098	14.0405	14.0808	13.138
TAG 56:5	24.8731	24.2103	24.7535	24.0609	24.217	23.2105	23.8901	23.5837	23.7026	25.2003	24.8908	25.1751	25.38	24.7369	25.8322	25.7828	26.0218	25.1873	24.8485	18.2953	18.3464	18.8329	18.0176	18.1414	18.3109	18.1586	18.0298	18.0652	18.5782	14.457	14.0887	14.209	15.003	14.5671	15.2235	15.5966	15.6373	15.4185	15.3924	12.0853	12.2231	11.94	13.0125	12.8353	NA	NA	NA	13.8967	NA
TAG 56:6	23.9896	23.2647	24.19	23.5769	23.3312	22.2249	23.2718	22.6243	22.9971	26.4831	24.6692	24.606	26.3166	23.879	25.3906	25.164	25.2628	24.3436	23.8383	18.8049	18.6779	19.5186	18.563	18.5604	19.0753	18.6567	18.5738	18.6824	19.2599	16.067	16.029	16.0673	16.4692	16.4307	17.2846	17.49	17.6699	17.5334	17.4923	12.6267	11.5732	11.6008	12.65	12.1	12.5329	12.5256	12.9524	12.7599	12.6357
TAG 58:2	27.1154	26.7356	27.348	26.574	26.8066	25.7295	26.3874	26.2038	26.2094	23.7352	23.4932	23.8038	23.9562	23.5376	24.3796	24.0096	24.8347	23.6726	23.1746	18.3612	18.414	18.8914	18.2418	18.2936	18.458	18.2472	18.2124	18.34	18.6641	12.413	12.0721	12.1796	12.9157	12.6099	12.1492	12.2956	12.1309	12.2636	12.0425	12.0587	11.3113	11.0485	12.0593	11.809	11.8851	11.259	11.6089	12.1871	11.1542
TAG 58:3	26.7206	26.2827	26.9255	26.2024	26.2853	25.3093	25.9304	25.6437	25.7585	23.6294	23.1675	23.6483	24.0064	23.4908	24.2218	23.8743	24.4591	23.3964	22.9463	18.6155	18.6158	19.1774	18.3906	18.5639	18.4403	18.3481	18.3195	18.4582	18.8851	11.0257	10.5691	10.7371	11.1426	10.7543	10.8192	10.8372	10.5654	10.491	10.3138	10.6827	10.2193	9.60035	10.6271	10.3969	10.812	9.33328	10.3984	11.0069	10.3167
TAG 58:4	25.0473	24.5397	25.1403	24.5164	24.7933	23.5183	24.3169	23.9822	24.0518	NA	20.9648	NA	NA	NA	21.9421	NA	NA	20.7724	NA	16.7384	16.6085	17.0956	16.3487	16.7512	16.2826	16.4342	16.425	16.4131	16.7648	14.0407	13.7175	13.5034	14.5755	14.1235	14.2089	14.55	14.4457	14.5002	14.349	13.8218	12.8301	12.6302	13.7814	13.117	13.6292	13.5999	14.1575	14.2758	13.2934
TAG 58:5	24.1695	23.7121	24.3599	23.6744	23.8113	22.7412	23.232	23.0504	23.011	25.4289	24.971	25.3977	25.6525	25.1622	26.0349	25.9213	26.2924	25.2679	24.9214	19.0174	18.9046	19.4325	18.759	18.7615	19.0854	18.4705	18.5581	18.4197	19.1379	13.2801	12.9168	12.9176	13.8004	13.5663	13.7225	13.7678	13.9065	13.522	13.8923	12.6118	11.6666	11.5215	12.6831	12.1199	12.5682	12.867	13.2977	13.3915	12.4312
TAG 58:6	20.9795	20.1177	20.9966	20.0029	20.2072	19.0602	19.9377	19.5915	20.0087	26.6419	26.2709	26.5855	26.7521	26.286	27.1361	27.012	27.3859	26.3628	25.9967	19.8755	19.6845	20.3454	19.5753	19.5776	19.9582	19.3396	19.4347	19.4597	19.9729	12.6551	12.6016	12.2627	13.301	13.1371	12.4337	12.8083	12.9092	12.9089	12.7292	11.5134	10.657	10.5598	11.4988	11.1024	11.0682	11.2598	11.475	11.5109	11.0864
TAG 60:10	22.941	22.2966	23.2522	22.6246	22.0482	21.0489	21.889	21.5216	21.9104	21.0243	21.1205	21.2103	21.3217	20.8089	21.5363	21.4395	21.9416	20.6591	20.8008	17.2502	17.2164	17.7691	16.9721	16.9173	17.6191	17.323	17.4607	17.3958	17.9562	12.1243	11.7902	11.9385	12.6582	12.1675	13.2399	13.4753	13.4613	13.5184	13.2526	NA	NA	NA	NA	NA	NA	NA	NA	NA	NA
TAG 60:11	26.7228	25.9391	26.6458	26.0552	25.8638	24.9842	25.6786	25.3124	25.3778	25.8107	25.3553	25.1779	25.4544	25.0528	25.264	25.2308	26.1837	25.6914	24.956	20.4596	20.34	21.0113	20.2101	20.0418	20.583	20.2138	20.3008	20.2646	20.8368	13.1429	12.4669	13.0656	13.9482	12.9721	14.3651	14.6956	14.7837	14.5459	14.6137	11.9088	11.3243	11.1389	12.1512	11.8075	12.6803	12.8695	13.0135	13.1477	13.0604
TAG 60:12	27.7918	27.0756	27.587	27.1086	26.9203	25.6854	26.7317	26.148	26.5867	27.5015	27.4826	27.4012	27.5145	27.0671	27.7302	27.562	28.3401	27.5787	27.2322	19.1686	19.3546	19.7985	19.0751	18.8028	20.3531	19.7343	19.7304	19.6827	20.5213	10.4394	NA	10.1537	10.9701	8.32419	11.4484	11.5477	11.306	11.9292	11.3679	13.5248	12.7513	12.6292	13.7684	13.2165	13.8979	14.4307	14.4272	14.5506	13.9823
TAG 60:13	27.1062	26.5573	27.2594	26.5775	26.5389	25.3709	26.2176	25.8418	26.2063	26.4402	26.3436	26.3456	26.4318	25.9252	26.7896	26.5281	27.3286	26.5504	26.3504	19.108	18.9362	19.5692	18.8268	18.6574	19.4416	18.7453	18.8631	18.8782	19.4643	NA	NA	NA	NA	NA	8.21111	8.90017	7.56941	8.93225	8.27357	10.7318	9.86357	9.53172	10.7254	10.4229	10.9488	11.182	11.5309	11.4893	10.9089
TAG 60:14	26.3143	25.7434	26.401	25.7192	25.7367	24.6045	25.4272	25.1193	25.4767	24.6988	24.6448	25.0307	24.9587	24.4301	25.5452	25.2241	26.0785	25.0951	24.8959	18.1521	18.3201	18.8327	18.1002	18.1759	18.0947	17.9326	18.0624	18.2301	18.5427	11.5659	10.935	11.3461	12.316	11.5907	12.7218	13.2056	13.0939	13.084	12.8916	NA	NA	NA	NA	NA	NA	NA	NA	NA	NA
TAG 60:15	24.6352	24.4734	24.8925	24.1136	24.5267	23.5046	24.0989	23.9342	24.23	21.7326	22.0769	22.6986	22.409	21.8513	23.3292	22.9395	23.9245	22.8309	22.7846	21.0219	21.1648	21.6597	20.9085	21.0926	20.7506	20.9894	21.0275	21.2159	21.4679	13.1364	12.1392	12.6982	13.9608	12.7545	14.3699	14.3795	14.2506	14.3462	14.2854	11.21	10.3233	10.0154	11.2566	10.6501	11.7534	12.3001	12.4769	12.6246	11.9762
TAG 60:3	25.3181	24.7902	25.4641	24.6352	25.045	23.8506	24.5505	24.3709	24.5121	NA	NA	NA	NA	20.604	21.6354	NA	22.7476	NA	NA	16.0482	16.0199	16.4978	15.7164	16.009	15.7223	15.6113	15.7671	15.7546	16.0074	8.833	NA	NA	8.641	8.56875	NA	7.69657	NA	NA	NA	8.21643	7.76067	NA	NA	NA	9.52636	NA	NA	9.07993	NA
TAG 60:4	23.8092	23.187	23.9834	23.2229	23.4874	22.587	23.0997	22.6579	22.9044	NA	NA	22.2376	NA	21.1209	22.4287	22.3283	22.7718	21.4977	21.3591	16.2288	15.7319	16.4047	15.6798	15.6292	16.0147	15.7318	15.6984	15.5818	16.2498	9.84286	9.46884	NA	9.65293	9.77139	NA	10.323	10.1551	10.3435	10.1027	9.75671	NA	7.99607	9.40673	NA	NA	NA	9.91342	9.65238	NA
TAG 60:5	24.1107	23.5523	24.5031	23.5222	23.3304	22.5	23.3175	22.8943	22.8861	25.0195	24.9845	25.1926	25.2582	24.7309	25.6047	25.4019	25.9431	24.8925	24.6326	18.6188	18.6663	19.2166	18.5046	18.626	18.9321	18.3141	18.2633	18.2409	18.8906	15.0553	14.7446	14.6121	15.613	15.21	15.3545	15.4324	15.3942	15.3579	15.3217	12.8136	12.0872	11.9232	12.9124	12.2339	12.7206	12.9216	13.621	13.5579	12.6021
TAG 60:6	23.2984	22.7243	23.4112	22.6158	22.7497	21.6843	22.5011	22.1273	22.251	25.6898	25.4066	25.5456	25.7803	25.2074	26.0254	25.9099	26.3992	25.352	25.1175	20.4586	20.497	21.0644	20.2925	20.2168	20.5734	19.9524	20.0034	19.9423	20.6019	14.6797	14.5134	14.3305	15.2454	14.9982	14.4111	14.2685	14.3114	14.3377	14.2659	13.1445	12.1328	12.0353	13.2743	12.5219	12.5093	12.8359	13.2964	13.2393	12.6123
TAG 60:7	21.6213	20.2397	21.724	20.3166	20.8115	19.9633	20.8537	20.411	20.0328	25.9852	26.0872	26.0526	25.8642	25.4389	26.118	26.0139	26.8116	25.6661	25.7664	19.7178	19.6969	20.3619	19.5739	19.7234	19.5945	19.3432	19.3316	19.4146	19.8685	13.5269	13.2174	12.9234	13.9752	13.7906	13.3107	12.8699	12.9786	12.9829	12.8963	12.5527	11.7763	11.2907	12.9243	11.8728	12.146	12.3125	13.0759	12.8367	12.0291
TAG 60:8	22.7506	22.1992	22.8083	21.9698	22.2752	21.3364	22.0615	21.7398	21.7648	23.3664	23.0759	23.4496	23.3036	22.7165	23.745	23.9102	24.3383	23.191	23.0845	17.4905	17.3603	17.9439	17.0491	16.8754	18.0664	17.8676	18.0614	17.7967	18.4867	11.0799	10.5001	10.4703	11.603	11.046	11.0743	11.3283	11.0221	11.3726	11.11	8.13978	7.41911	6.96142	8.22886	NA	7.99071	8.38788	9.02575	9.1174	7.89826
TAG 60:9	23.1459	22.416	23.119	22.5363	22.3678	21.4195	22.0935	21.7786	22.031	24.4844	24.2091	24.3896	24.7688	24.0833	25.2681	25.1356	25.5218	24.2726	24.1842	20.1475	20.1487	20.8388	20.0129	19.9515	20.5153	20.3339	20.2517	20.273	20.8775	11.3656	10.9459	11.0329	11.9771	11.6479	11.7828	11.7748	11.6012	11.8701	11.5067	10.0486	8.95976	8.04887	10.0332	8.55266	9.43964	9.83843	10.6401	10.5892	9.69825
TAG 62:10	20.4774	20.339	20.9517	20.0965	20.6262	19.437	19.8042	20.0186	20.1436	NA	22.5688	23.6192	22.7489	23.8124	24.0336	23.7584	24.4231	23.1766	23.2631	16.7616	16.7652	17.7349	16.6152	17.0877	17.2905	16.6824	16.8953	17.4974	17.6216	11.1267	10.7167	10.9396	11.9229	11.3528	12.0507	12.5285	12.2922	12.4684	12.2163	9.66896	9.15985	NA	10.1556	NA	NA	NA	9.38247	9.89221	NA
TAG 62:12	25.6032	25.04	25.6152	24.9036	24.9308	23.8697	24.6467	24.2675	23.9941	24.7977	24.7917	24.5004	24.6956	24.3935	25.1822	25.1186	25.5609	24.7483	24.4676	17.3259	17.0749	17.728	17.0567	16.7271	17.4169	16.9452	16.8979	17.059	17.5698	NA	NA	NA	NA	NA	NA	NA	NA	NA	NA	NA	NA	NA	NA	NA	NA	NA	NA	NA	NA
TAG 62:13	23.5898	22.9981	23.6786	23.0342	22.962	21.6095	22.6713	22.0955	22.6109	25.7409	25.6948	25.633	25.6732	25.315	26.0875	25.7671	26.5306	25.7987	25.6003	16.5726	16.8925	17.6434	16.6582	16.6074	17.5428	16.7368	16.9774	16.8868	17.3855	NA	NA	NA	NA	NA	NA	NA	NA	NA	NA	NA	NA	NA	NA	NA	NA	NA	NA	NA	NA
TAG 62:14	24.7155	24.0359	24.8946	24.1614	24.083	22.8553	23.7629	23.3626	23.601	23.1839	23.2435	23.2139	23.3236	22.8553	23.5642	23.5511	24.3878	23.3758	23.3266	15.8195	15.9841	16.5489	15.601	15.5683	16.0008	15.4145	15.642	15.8802	16.2312	NA	NA	NA	NA	NA	7.73133	8.15745	8.48594	8.71272	8.16865	3.97503	NA	NA	NA	NA	NA	NA	NA	NA	NA
TAG 62:15	25.8015	25.4104	26.1221	25.3888	25.2663	24.2232	24.9733	24.7173	25.0299	23.9636	24.0821	24.0611	24.0343	23.6867	24.458	24.088	25.1742	24.3753	24.0738	16.4175	16.4689	17.2846	16.3463	16.3211	16.7617	16.3214	16.2641	16.4199	16.8112	12.8166	11.826	12.4225	13.5393	12.4401	14.2852	14.5688	14.3699	14.5605	14.3119	NA	NA	NA	NA	NA	NA	NA	NA	NA	NA
TAG 62:4	20.1549	19.7036	20.3919	19.5458	19.5991	18.7715	19.3981	19.1358	19.1055	NA	NA	NA	NA	NA	NA	NA	NA	NA	NA	NA	NA	NA	NA	NA	NA	NA	NA	NA	NA	NA	NA	NA	NA	NA	NA	NA	NA	NA	NA	NA	NA	NA	NA	NA	NA	NA	NA	NA	NA
TAG 62:5	24.8333	24.5714	25.1305	24.2954	24.5184	23.6252	24.2232	24.048	23.9517	NA	NA	NA	NA	NA	NA	NA	NA	NA	NA	14.5595	14.2672	14.727	14.1638	14.1962	14.4015	13.8083	13.9657	13.7225	14.2829	11.8697	11.4988	11.4243	12.2677	11.9895	11.6971	12.348	12.005	12.2914	11.9114	NA	NA	NA	NA	NA	NA	NA	NA	NA	NA
TAG 62:6	24.2409	23.7871	24.4307	23.5565	23.7469	22.751	23.4711	23.1553	23.2562	NA	NA	NA	NA	NA	NA	NA	NA	NA	NA	16.0706	16.0214	16.5179	15.7686	15.9752	16.0935	15.7161	15.8013	15.5846	16.2747	9.90996	9.58915	9.48544	10.4277	10.2189	9.78171	NA	9.63736	10.0463	9.79118	9.03138	7.66527	7.74548	8.91231	NA	NA	7.15511	8.32001	8.45494	NA
TAG 62:7	23.9335	23.3977	23.9246	23.2182	23.5081	22.4022	23.0599	22.657	22.9875	25.8015	25.8243	25.8847	25.691	25.2461	25.92	25.8408	26.6619	25.5257	25.5021	16.8	16.8535	17.2507	16.6446	16.6779	16.7303	16.5835	16.4958	16.6126	17.0955	9.68541	8.54755	8.6207	9.83532	9.51571	9.70375	10.1621	8.47022	10.2991	9.76872	9.22	7.52846	6.98673	8.406	NA	NA	NA	8.11993	8.15871	NA
TAG 62:8	23.1135	22.8295	23.3281	22.6084	22.4685	21.5645	22.3735	22.0051	22.0753	23.4318	23.7269	23.8258	23.5403	23.2792	23.746	23.8699	24.5803	23.3121	23.3111	15.1681	15.0841	15.5727	15.1194	15.302	14.468	15.291	14.9399	15.3645	15.3346	7.15131	NA	NA	7.59071	NA	NA	NA	NA	NA	NA	6.91233	NA	NA	8.66485	NA	NA	NA	NA	NA	NA
TAG 62:9	22.8014	22.392	23.0371	22.0526	22.354	21.4733	22.2117	21.9016	21.992	21.6045	21.7301	22.5717	22.2954	22.1567	23.3966	23.2132	23.704	22.6283	22.2616	18.0161	18.0511	18.5117	17.735	17.9139	17.9043	17.6312	17.5209	17.6141	18.1429	12.9013	12.547	12.4225	13.4443	12.7614	12.3174	12.7867	12.4932	12.6757	12.5508	11.0844	10.0693	9.52673	11.209	10.0108	10.1744	10.497	11.3678	11.4629	10.123
TAG 64.13	NA	NA	NA	NA	NA	NA	NA	NA	NA	NA	NA	NA	20.2989	20.6959	21.5219	21.4024	21.8226	NA	20.2516	17.0593	17.1682	17.9264	16.8398	16.682	17.0992	16.6597	17.0093	16.8682	16.9548	NA	NA	NA	NA	NA	NA	NA	NA	NA	NA	NA	NA	NA	NA	NA	NA	NA	NA	NA	NA
TAG 64.14	23.2303	23.1686	23.4266	23.1266	22.5733	21.4176	22.4502	22.0788	21.8311	NA	NA	NA	NA	NA	NA	NA	NA	NA	NA	17.5571	17.5499	18.1024	17.4431	17.1717	17.6441	17.3233	17.5224	17.4248	18.0504	NA	NA	NA	NA	NA	NA	NA	NA	NA	NA	NA	NA	NA	NA	NA	NA	NA	NA	NA	NA
TAG 64.15	22.7326	22.0962	22.6733	22.0732	22.157	21.0498	21.6341	21.5766	20.7569	NA	NA	22.21	21.6584	NA	22.608	22.3389	23.374	NA	NA	17.7001	17.8063	18.4332	17.6505	17.5065	17.9189	17.439	17.5383	17.7772	18.1232	NA	NA	NA	NA	NA	NA	NA	NA	NA	NA	NA	NA	NA	NA	NA	NA	NA	NA	NA	NA
TAG 64.17	21.8434	21.5427	22.1855	21.5577	21.7102	20.5287	21.1832	20.955	21.3017	NA	NA	NA	NA	NA	NA	NA	NA	NA	NA	17.7694	17.741	18.4092	17.5818	17.5122	17.9719	17.5323	17.5641	17.6093	18.1169	NA	NA	NA	NA	NA	NA	NA	NA	NA	NA	7.76073	6.05615	NA	NA	NA	NA	7.56534	8.38621	8.32016	NA
TAG 64:10	20.4843	19.9041	20.8682	20.4041	20.0339	18.9414	19.823	19.3392	19.1662	21.6624	21.0218	22.3354	22.3279	21.9248	23.1822	22.6977	23.3425	22.1473	21.8833	17.6153	17.4643	17.9239	17.1575	17.2918	17.4721	16.9287	16.9939	16.9845	17.5214	12.475	12.5359	12.5219	12.9417	12.7262	12.7731	12.6976	12.533	12.5739	12.6223	15.788	14.7493	14.3545	15.8848	15.0856	14.2582	14.0267	15.0212	14.7456	14.0009
TAG 64:16	22.6869	22.4535	23.079	22.3617	22.2735	21.263	21.7592	21.6567	21.8218	NA	NA	NA	NA	NA	20.549	20.4787	20.9972	19.3806	19.4689	14.7846	14.6451	15.2422	14.5239	14.6275	14.9087	14.3263	14.2296	14.5577	14.93	NA	NA	NA	NA	NA	NA	NA	NA	NA	NA	NA	NA	NA	NA	NA	NA	NA	NA	NA	NA
TAG 64:5	20.17	19.9097	20.5351	19.4195	19.8581	19.1762	19.5613	19.5208	19.4987	NA	NA	NA	NA	NA	NA	NA	NA	NA	NA	NA	NA	NA	NA	NA	NA	NA	NA	NA	NA	NA	NA	NA	NA	NA	NA	NA	NA	NA	NA	NA	NA	NA	NA	NA	NA	NA	NA	NA	NA
TAG 64:6	22.6645	22.3372	22.5835	21.9191	22.5139	21.3444	21.8052	21.8394	21.7524	NA	21.3448	21.8766	21.858	21.414	22.5523	22.5341	22.8933	21.8382	21.2735	NA	NA	NA	NA	NA	NA	NA	NA	NA	NA	NA	NA	NA	NA	NA	NA	NA	NA	NA	NA	NA	NA	NA	NA	NA	NA	NA	NA	NA	NA
TAG 64:7	24.5213	24.2133	24.532	23.8774	24.2505	23.1444	23.6594	23.6502	23.5196	24.5839	24.1425	24.5299	24.7372	24.1175	25.2868	25.1868	25.5102	24.5914	24.2398	11.3352	12.4122	12.4185	11.489	12.8668	NA	10.7979	11.4131	11.8134	13.1256	10.0003	9.82385	9.6599	10.3621	10.3234	11.1131	11.2247	11.1838	11.2784	11.2432	11.8193	10.9242	10.5087	11.831	11.1068	10.9317	10.7549	11.5516	11.3642	11.2435
TAG 64:8	23.557	23.1376	23.5104	22.9268	23.2237	22.0894	22.6847	22.4289	22.5825	23.5582	23.2348	23.4519	23.7682	23.226	24.0041	24.0926	24.538	23.4955	23.2779	11.5892	12.3026	11.614	12.0927	12.2062	NA	10.6634	11.1289	11.4107	NA	7.98701	8.19437	8.21564	7.98131	8.77012	7.07773	7.98712	7.74157	7.96059	6.85201	10.5051	9.87928	9.43805	10.8546	10.0955	8.64888	8.52059	9.584	9.69024	8.64803
TAG 66:10	21.6132	21.7019	21.8649	21.4997	21.6276	20.1379	20.8542	20.8074	21.002	22.1257	22.1265	22.8133	22.7462	22.588	23.224	23.5535	23.8411	22.7891	22.2118	14.9236	15.5669	15.8999	15.006	16.016	NA	14.7704	14.654	15.0465	14.7987	12.96	13.0074	12.9168	13.458	13.2863	13.3781	13.318	13.1374	13.2436	13.2216	15.7427	14.8437	14.4934	15.8959	15.2756	14.6506	14.4996	15.1984	15.071	14.3497
TAG 66:11	20.7968	20.6972	21.4946	20.9069	20.9046	19.7353	20.29	20.4049	20.167	21.396	23.8853	24.4229	24.0455	23.8393	24.3694	24.2387	24.862	24.3955	24.0544	16.6096	16.4024	16.933	16.3045	16.1807	16.4598	16.3348	16.2657	16.1712	16.7451	12.3404	12.092	12.1065	12.7014	12.7305	12.7041	12.3854	12.2897	12.2765	12.3133	15.1772	14.2226	13.8169	15.2968	14.5802	13.7975	13.643	14.6116	14.3252	13.6705
TAG 66:13	NA	NA	NA	NA	NA	NA	NA	NA	NA	NA	NA	18.9391	NA	18.7152	NA	NA	NA	NA	NA	NA	13.3925	13.7461	12.8641	12.7303	13.1701	13.5543	NA	12.3689	13.8511	10.4623	10.5935	10.3929	10.7588	10.6843	11.1507	11.2843	11.1333	10.9362	11.2796	12.9962	12.2593	11.9473	13.1774	12.492	12.3308	12.4083	12.904	12.8669	12.1669
TAG 66:18	NA	NA	NA	NA	NA	NA	NA	NA	NA	NA	NA	NA	NA	NA	NA	NA	NA	NA	NA	NA	NA	NA	NA	NA	NA	NA	NA	NA	NA	NA	NA	NA	NA	NA	NA	NA	NA	NA	NA	NA	NA	NA	NA	NA	NA	NA	NA	NA	NA
TAG 66:7	25.6153	25.414	25.5864	24.9802	25.5208	24.3524	24.8343	24.8316	24.7243	25.4478	25.1399	25.2709	25.5261	25.0438	25.9386	25.8689	26.264	25.2166	24.9169	14.3465	14.687	15.4477	14.3179	15.2734	NA	14.3289	14.3281	14.6858	14.0266	11.0704	10.7093	11.0835	11.7304	11.3548	12.3519	12.4402	12.4238	12.5155	12.3144	12.9537	12.0779	11.7575	13.1336	12.3154	11.8818	11.745	12.3934	12.3155	11.5969
TAG 66:8	25.7327	25.488	25.7931	25.2417	25.584	24.3115	24.9084	24.923	24.7785	25.3462	24.8159	25.1865	25.4345	25.052	26.0275	25.8997	26.2139	25.0763	24.7275	15.071	15.5463	16.0088	15.1035	16.1556	NA	14.8354	14.5424	14.8089	14.8769	11.8087	11.8007	11.7036	12.2067	12.2083	11.8741	11.7241	11.7182	11.7184	11.5089	13.4972	12.7251	12.5217	13.9854	13.1402	11.9017	11.8912	12.4825	12.6355	11.9186
TAG 66:9	22.8955	22.4587	22.8748	22.415	22.4611	21.2792	21.9305	21.7974	21.9032	22.6389	22.7591	22.8797	24.1421	22.4456	23.719	24.2925	24.0935	23.0011	22.6851	12.8252	13.3966	13.8214	13.2149	14.066	NA	NA	12.5107	12.8172	NA	9.9669	9.82353	9.73556	10.2525	10.0561	9.83648	10.0781	9.42805	9.8003	9.76389	12.6078	11.9872	11.4327	12.8415	12.1689	11.5708	11.4423	12.231	12.0717	11.2472
[truncated: 80 more columns]
